# Supplementary material for: Eiger/TNFα-mediated Dilp8 and ROS production coordinate intra-organ growth in Drosophila
Source: PubMed Central journal article supplement (PMC6715248; doi:10.1371/journal.pgen.1008133), 2019-08-19
Supplement: pgen.1008133.s007.pdf [file pgen.1008133.s007.pdf]

| Gene Name | FlyBase ID  | Description                                          | logFC | P.Value |
|-----------|-------------|------------------------------------------------------|-------|---------|
| CG6908    | FBgn0037936 | CG6908 gene product from transcript CG6908-RA        | 9,7   | 1,4E-06 |
| CG11893   | FBgn0039316 | CG11893 gene product from transcript CG11893-RA      | 8,4   | 5,5E-07 |
| CG14695   | FBgn0037850 | CG14695 gene product from transcript CG14695-RA      | 6,7   | 1,2E-05 |
| CG33468   | FBgn0053468 | CG33468 gene product from transcript CG33468-RA      | 6,4   | 2,6E-05 |
| CG13659   | FBgn0039319 | CG13659 gene product from transcript CG13659-RA      | 6,2   | 3,0E-05 |
| CG31436   | FBgn0051436 | CG31436 gene product from transcript CG31436-RA      | 5,7   | 1,6E-04 |
| Arc1      | FBgn0033926 | Activity-regulated cytoskeleton associated protein 1 | 5,4   | 1,4E-07 |
| Hr51      | FBgn0034012 | Hormone receptor 51                                  | 4,9   | 4,0E-06 |
| CG42365   | FBgn0259711 | CG42365 gene product from transcript CG42365-RA      | 4,3   | 2,5E-05 |
| CG32368   | FBgn0052368 | CG32368 gene product from transcript CG32368-RA      | 4,3   | 2,5E-04 |
| CG30269   | FBgn0050269 | CG30269 gene product from transcript CG30269-RB      | 4,2   | 1,6E-03 |
| CG12868   | FBgn0033945 | CG12868 gene product from transcript CG12868-RB      | 4,1   | 4,4E-06 |
| Ilp8      | FBgn0036690 | Insulin-like peptide 8                               | 3,9   | 6,6E-03 |
| Gp210     | FBgn0266580 | Gp210 ortholog (H. sapiens)                          | 3,9   | 1,1E-02 |
| Swim      | FBgn0034709 | Secreted Wg-interacting molecule                     | 3,8   | 4,0E-05 |
| CG15784   | FBgn0029766 | CG15784 gene product from transcript CG15784-RB      | 3,7   | 2,7E-05 |
| Sodh-2    | FBgn0022359 | Sorbitol dehydrogenase-2                             | 3,7   | 2,0E-03 |
| TotA      | FBgn0028396 | Turandot A                                           | 3,6   | 1,2E-02 |
| CG33469   | FBgn0053469 | CG33469 gene product from transcript CG33469-RB      | 3,6   | 1,4E-06 |
| CG11897   | FBgn0039644 | CG11897 gene product from transcript CG11897-RB      | 3,3   | 8,8E-04 |
| GstE6     | FBgn0063494 | Glutathione S transferase E6                         | 3,3   | 1,4E-05 |
| CG31279   | FBgn0051279 | CG31279 gene product from transcript CG31279-RD      | 3,1   | 1,0E-02 |
| sunn      | FBgn0052088 | sisters unbound                                      | 3,1   | 1,0E-03 |
| LManII    | FBgn0027611 | Lysosomal alpha-mannosidase II                       | 2,9   | 7,0E-03 |
| CG4576    | FBgn0038366 | CG4576 gene product from transcript CG4576-RA        | 2,9   | 7,2E-04 |
| ImpL3     | FBgn0001258 | Ecdysone-inducible gene L3                           | 2,9   | 5,6E-04 |
| Ir76a     | FBgn0260874 | Ionotropic receptor 76a                              | 2,9   | 5,4E-03 |
| MtnA      | FBgn0002868 | Metallothionein A                                    | 2,9   | 3,4E-04 |
| Glut1     | FBgn0264574 | Glucose transporter 1                                | 2,9   | 1,7E-06 |
| Damm      | FBgn0033659 | Death associated molecule related to Mch2 caspase    | 2,8   | 4,4E-06 |
| Spn47C    | FBgn0033574 | Serpin 47C                                           | 2,8   | 1,7E-05 |
| CG6678    | FBgn0038917 | CG6678 gene product from transcript CG6678-RA        | 2,7   | 1,7E-02 |
| CG8620    | FBgn0040837 | CG8620 gene product from transcript CG8620-RA        | 2,6   | 3,8E-03 |
| GstD5     | FBgn0010041 | Glutathione S transferase D5                         | 2,6   | 4,0E-03 |
| CG12535   | FBgn0029657 | CG12535 gene product from transcript CG12535-RF      | 2,5   | 1,9E-05 |
| CG17018   | FBgn0039972 | CG17018 gene product from transcript CG17018-RE      | 2,5   | 6,3E-03 |
| CG32625   | FBgn0052625 | CG32625 gene product from transcript CG32625-RA      | 2,4   | 5,5E-03 |
| CG32195   | FBgn0052195 | CG32195 gene product from transcript CG32195-RA      | 2,4   | 2,5E-04 |
| CG7768    | FBgn0036415 | CG7768 gene product from transcript CG7768-RA        | 2,3   | 2,8E-04 |
| Gadd45    | FBgn0033153 | CG11086 gene product from transcript CG11086-RA      | 2,3   | 4,0E-04 |
| CG11263   | FBgn0036330 | CG11263 gene product from transcript CG11263-RA      | 2,3   | 2,6E-03 |
| CG34227   | FBgn0085256 | CG34227 gene product from transcript CG34227-RA      | 2,2   | 2,2E-03 |

|             |             |                                                 |     |         |
|-------------|-------------|-------------------------------------------------|-----|---------|
| CG30424     | FBgn0050424 | CG30424 gene product from transcript CG30424-RB | 2,2 | 3,6E-03 |
| Rph         | FBgn0030230 | Rabphilin                                       | 2,2 | 4,7E-02 |
| CG10337     | FBgn0032805 | CG10337 gene product from transcript CG10337-RA | 2,2 | 4,1E-03 |
| CG31705     | FBgn0028490 | CG31705 gene product from transcript CG31705-RE | 2,1 | 1,3E-02 |
| Gbeta5      | FBgn0030011 | CG10763 gene product from transcript CG10763-RA | 2,0 | 4,8E-04 |
| CG31370     | FBgn0051370 | CG31370 gene product from transcript CG31370-RB | 2,0 | 7,8E-03 |
| Mocs1       | FBgn0263241 | Molybdenum cofactor synthesis 1 ortholog        | 2,0 | 6,0E-04 |
| moody       | FBgn0025631 | CG4322 gene product from transcript CG4322-RD   | 2,0 | 2,5E-02 |
| mbl         | FBgn0265487 | CG33197 gene product from transcript CG33197-RP | 1,9 | 1,7E-04 |
| CG3568      | FBgn0029710 | CG3568 gene product from transcript CG3568-RA   | 1,9 | 5,1E-03 |
| Tg          | FBgn0031975 | Transglutaminase                                | 1,9 | 4,7E-03 |
| CG9171      | FBgn0031738 | CG9171 gene product from transcript CG9171-RD   | 1,9 | 4,1E-04 |
| nAChRalpha4 | FBgn0266347 | nicotinic Acetylcholine Receptor alpha4         | 1,8 | 2,9E-02 |
| unc-13-4A   | FBgn0035756 | CG32381 gene product from transcript CG32381-RC | 1,8 | 3,4E-02 |
| CG14275     | FBgn0032022 | CG14275 gene product from transcript CG14275-RA | 1,8 | 1,1E-02 |
| CG3008      | FBgn0031643 | CG3008 gene product from transcript CG3008-RA   | 1,8 | 7,3E-05 |
| CG3448      | FBgn0035996 | CG3448 gene product from transcript CG3448-RB   | 1,8 | 1,5E-03 |
| CG15611     | FBgn0034194 | CG15611 gene product from transcript CG15611-RA | 1,7 | 7,9E-05 |
| CG31633     | FBgn0051633 | CG31633 gene product from transcript CG31633-RA | 1,7 | 5,1E-04 |
| CG43117     | FBgn0262577 | CG43117 gene product from transcript CG43117-RB | 1,7 | 1,3E-03 |
| CG1299      | FBgn0035501 | CG1299 gene product from transcript CG1299-RA   | 1,7 | 3,3E-03 |
| CG2909      | FBgn0030189 | CG2909 gene product from transcript CG2909-RA   | 1,6 | 8,3E-03 |
| CG14879     | FBgn0038419 | CG14879 gene product from transcript CG14879-RC | 1,6 | 3,6E-02 |
| CG15739     | FBgn0030347 | CG15739 gene product from transcript CG15739-RA | 1,6 | 4,0E-02 |
| spn-E       | FBgn0003483 | spindle E                                       | 1,6 | 2,3E-02 |
| Rab9        | FBgn0032782 | CG9994 gene product from transcript CG9994-RA   | 1,5 | 1,5E-03 |
| CG2201      | FBgn0032955 | CG2201 gene product from transcript CG2201-RF   | 1,5 | 3,8E-03 |
| CR42646     | FBgn0261429 | ncRNA                                           | 1,5 | 2,1E-03 |
| e(y)2b      | FBgn0040670 | enhancer of yellow 2b                           | 1,5 | 2,4E-02 |
| her         | FBgn0001185 | hermaphrodite                                   | 1,5 | 2,5E-02 |
| Cyp6g2      | FBgn0033696 | CG8859 gene product from transcript CG8859-RA   | 1,5 | 3,6E-03 |
| Arc2        | FBgn0033928 | CG13941 gene product from transcript CG13941-RA | 1,4 | 8,8E-04 |
| CG7924      | FBgn0036416 | CG7924 gene product from transcript CG7924-RA   | 1,4 | 4,4E-02 |
| Ror         | FBgn0010407 | CG4926 gene product from transcript CG4926-RA   | 1,4 | 4,3E-02 |
| CG32196     | FBgn0052196 | CG32196 gene product from transcript CG32196-RC | 1,4 | 3,1E-03 |
| CHKov2      | FBgn0039328 | CG10675 gene product from transcript CG10675-RA | 1,4 | 5,8E-04 |
| egr         | FBgn0033483 | eiger                                           | 1,3 | 1,1E-02 |
| CG7997      | FBgn0034117 | CG7997 gene product from transcript CG7997-RB   | 1,3 | 1,5E-02 |
| Ugt86Di     | FBgn0040251 | CG6658 gene product from transcript CG6658-RB   | 1,3 | 7,3E-04 |
| CG11843     | FBgn0039630 | CG11843 gene product from transcript CG11843-RB | 1,3 | 1,0E-02 |
| CG13248     | FBgn0036984 | CG13248 gene product from transcript CG13248-RA | 1,3 | 4,6E-03 |
| FucTC       | FBgn0044872 | CG40305 gene product from transcript CG40305-RB | 1,3 | 2,9E-02 |
| CG2017      | FBgn0037391 | CG2017 gene product from transcript CG2017-RD   | 1,3 | 4,4E-03 |

|         |             |                                                     |      |         |
|---------|-------------|-----------------------------------------------------|------|---------|
| Zmynd10 | FBgn0266709 | ZMYND10 homolog                                     | 1,3  | 1,3E-02 |
| CG8950  | FBgn0034186 | CG8950 gene product from transcript CG8950-RB       | 1,3  | 1,5E-04 |
| CG7322  | FBgn0030968 | CG7322 gene product from transcript CG7322-RA       | 1,3  | 1,6E-02 |
| lama    | FBgn0016031 | lamina ancestor                                     | 1,3  | 3,1E-02 |
| CG13255 | FBgn0040636 | CG13255 gene product from transcript CG13255-RB     | 1,3  | 3,3E-03 |
| Ku80    | FBgn0041627 | CG18801 gene product from transcript CG18801-RA     | 1,3  | 7,3E-03 |
| CG17470 | FBgn0032869 | CG17470 gene product from transcript CG17470-RA     | 1,2  | 1,5E-02 |
| Shal    | FBgn0005564 | Shaker cognate I                                    | 1,2  | 2,3E-02 |
| CG13029 | FBgn0036670 | CG13029 gene product from transcript CG13029-RC     | 1,2  | 2,2E-04 |
| Blos2   | FBgn0036118 | Biogenesis of lysosome-related organelles complex 1 | 1,2  | 7,1E-03 |
| CG6321  | FBgn0036117 | CG6321 gene product from transcript CG6321-RA       | 1,2  | 3,5E-02 |
| plum    | FBgn0039431 | CG6490 gene product from transcript CG6490-RD       | 1,2  | 5,5E-04 |
| GstE7   | FBgn0063493 | Glutathione S transferase E7                        | 1,2  | 1,9E-04 |
| CG6272  | FBgn0036126 | CG6272 gene product from transcript CG6272-RB       | 1,2  | 5,4E-04 |
| Gcn5    | FBgn0020388 | Gcn5 ortholog                                       | 1,2  | 1,1E-02 |
| CG13024 | FBgn0036665 | CG13024 gene product from transcript CG13024-RC     | 1,2  | 1,8E-02 |
| CG32549 | FBgn0052549 | CG32549 gene product from transcript CG32549-RD     | 1,2  | 4,2E-02 |
| CG14545 | FBgn0040602 | CG14545 gene product from transcript CG14545-RA     | 1,2  | 1,0E-02 |
| CG6701  | FBgn0033889 | CG6701 gene product from transcript CG6701-RD       | 1,2  | 2,3E-02 |
| GstE9   | FBgn0063491 | Glutathione S transferase E9                        | 1,2  | 3,0E-03 |
| CG13890 | FBgn0035169 | CG13890 gene product from transcript CG13890-RA     | 1,1  | 6,9E-05 |
| CG6426  | FBgn0034162 | CG6426 gene product from transcript CG6426-RA       | 1,1  | 2,7E-02 |
| CG10916 | FBgn0034312 | CG10916 gene product from transcript CG10916-RB     | 1,1  | 4,4E-04 |
| CG3726  | FBgn0029824 | CG3726 gene product from transcript CG3726-RB       | 1,1  | 2,0E-02 |
| CG6762  | FBgn0030876 | CG6762 gene product from transcript CG6762-RD       | 1,1  | 4,9E-02 |
| CG31694 | FBgn0051694 | CG31694 gene product from transcript CG31694-RA     | 1,1  | 1,2E-02 |
| Pvf1    | FBgn0030964 | PDGF- and VEGF-related factor 1                     | 1,1  | 4,6E-02 |
| fan     | FBgn0028379 | farinelli                                           | 1,1  | 4,7E-02 |
| CG42299 | FBgn0259195 | CG42299 gene product from transcript CG42299-RA     | 1,1  | 2,4E-02 |
| Alg-2   | FBgn0086378 | Apoptosis-linked gene-2                             | 1,1  | 8,8E-03 |
| CG32645 | FBgn0052645 | CG32645 gene product from transcript CG32645-RB     | 1,1  | 1,1E-02 |
| Ttc19   | FBgn0032744 | Tetratricopeptide repeat domain 19                  | 1,0  | 5,8E-03 |
| CG7367  | FBgn0031976 | CG7367 gene product from transcript CG7367-RD       | 1,0  | 1,1E-02 |
| LamC    | FBgn0010397 | Lamin C                                             | 1,0  | 4,1E-02 |
| CG18094 | FBgn0032791 | CG18094 gene product from transcript CG18094-RB     | 1,0  | 2,3E-02 |
| Gclc    | FBgn0040319 | Glutamate-cysteine ligase catalytic subunit         | 1,0  | 8,5E-04 |
| Xrp1    | FBgn0261113 | CG17836 gene product from transcript CG17836-RB     | 1,0  | 9,4E-04 |
| CG3009  | FBgn0029720 | CG3009 gene product from transcript CG3009-RD       | -1,0 | 4,6E-02 |
| hd      | FBgn0086695 | humpty dumpty                                       | -1,0 | 1,4E-02 |
| CG30099 | FBgn0050099 | CG30099 gene product from transcript CG30099-RA     | -1,0 | 1,0E-03 |
| CG9850  | FBgn0034903 | CG9850 gene product from transcript CG9850-RC       | -1,0 | 4,2E-02 |
| Gbs-76A | FBgn0036862 | Glycogen binding subunit 76A                        | -1,0 | 7,5E-03 |
| CG14598 | FBgn0037503 | CG14598 gene product from transcript CG14598-RA     | -1,1 | 3,4E-02 |

|            |             |                                                 |      |         |
|------------|-------------|-------------------------------------------------|------|---------|
| kar        | FBgn0001296 | karmoisin                                       | -1,1 | 2,3E-02 |
| CG13044    | FBgn0036599 | CG13044 gene product from transcript CG13044-RA | -1,1 | 4,7E-03 |
| CG4562     | FBgn0038740 | CG4562 gene product from transcript CG4562-RC   | -1,1 | 2,5E-02 |
| CG13737    | FBgn0036382 | CG13737 gene product from transcript CG13737-RA | -1,1 | 4,6E-02 |
| Sep4       | FBgn0259923 | Septin 4                                        | -1,1 | 1,3E-02 |
| mthl4      | FBgn0034219 | methuselah-like 4                               | -1,1 | 2,9E-03 |
| CG10211    | FBgn0032685 | CG10211 gene product from transcript CG10211-RB | -1,2 | 4,1E-02 |
| RhoGAP100F | FBgn0039883 | Rho GTPase activating protein at 100F           | -1,2 | 2,5E-02 |
| grass      | FBgn0039494 | Gram-positive Specific Serine protease          | -1,2 | 7,4E-03 |
| CG15356    | FBgn0031377 | CG15356 gene product from transcript CG15356-RA | -1,2 | 4,9E-02 |
| CR31451    | FBgn0051451 | ncRNA                                           | -1,2 | 2,2E-02 |
| NaCP60E    | FBgn0085434 | Na channel protein 60E                          | -1,3 | 3,2E-02 |
| se         | FBgn0086348 | sepia                                           | -1,3 | 4,2E-02 |
| CG14785    | FBgn0027795 | CG14785 gene product from transcript CG14785-RA | -1,3 | 3,8E-04 |
| CG31495    | FBgn0051495 | CG31495 gene product from transcript CG31495-RA | -1,3 | 4,7E-03 |
| Pdp1       | FBgn0016694 | PAR-domain protein 1                            | -1,3 | 3,0E-02 |
| CG1698     | FBgn0033443 | CG1698 gene product from transcript CG1698-RA   | -1,4 | 4,5E-02 |
| CG9961     | FBgn0031451 | CG9961 gene product from transcript CG9961-RB   | -1,4 | 2,1E-02 |
| l(2)34Fc   | FBgn0261534 | lethal (2) 34Fc                                 | -1,4 | 7,8E-03 |
| CG10804    | FBgn0029663 | CG10804 gene product from transcript CG10804-RD | -1,5 | 2,4E-02 |
| CG4313     | FBgn0025632 | CG4313 gene product from transcript CG4313-RE   | -1,5 | 1,8E-03 |
| CG14566    | FBgn0037127 | CG14566 gene product from transcript CG14566-RB | -1,5 | 3,3E-03 |
| Sema-1a    | FBgn0011259 | CG18405 gene product from transcript CG18405-RE | -1,5 | 9,4E-04 |
| Faa        | FBgn0016013 | Fumarylacetoacetase                             | -1,6 | 1,5E-02 |
| Obp56a     | FBgn0034468 | Odorant-binding protein 56a                     | -1,6 | 4,9E-02 |
| CG1894     | FBgn0039585 | CG1894 gene product from transcript CG1894-RA   | -1,6 | 5,9E-03 |
| CG31324    | FBgn0051324 | CG31324 gene product from transcript CG31324-RB | -1,6 | 8,5E-03 |
| CG5335     | FBgn0034365 | CG5335 gene product from transcript CG5335-RA   | -1,6 | 2,8E-02 |
| CG34002    | FBgn0054002 | CG34002 gene product from transcript CG34002-RB | -1,6 | 4,8E-04 |
| Cyp4e2     | FBgn0014469 | Cytochrome P450-4e2                             | -1,6 | 1,2E-03 |
| CG17803    | FBgn0038547 | CG17803 gene product from transcript CG17803-RB | -1,6 | 1,4E-03 |
| pgant8     | FBgn0036529 | polypeptide GalNAc transferase 8                | -1,6 | 4,9E-04 |
| pst        | FBgn0035770 | pastrel                                         | -1,6 | 4,1E-03 |
| CG13692    | FBgn0031254 | CG13692 gene product from transcript CG13692-RA | -1,7 | 5,1E-03 |
| dnc        | FBgn0000479 | dunce                                           | -1,7 | 1,1E-02 |
| CG31140    | FBgn0051140 | CG31140 gene product from transcript CG31140-RB | -1,7 | 1,7E-02 |
| CG10344    | FBgn0034729 | CG10344 gene product from transcript CG10344-RA | -1,8 | 9,6E-04 |
| CG18537    | FBgn0034323 | CG18537 gene product from transcript CG18537-RA | -1,9 | 6,7E-04 |
| Rbm13      | FBgn0030067 | RNA-binding motif protein 13                    | -1,9 | 7,9E-03 |
| tut        | FBgn0052364 | tumorous testis                                 | -1,9 | 3,1E-04 |
| CG3323     | FBgn0029750 | CG3323 gene product from transcript CG3323-RA   | -1,9 | 2,5E-03 |
| Cadps      | FBgn0053653 | Calcium-dependent secretion activator           | -1,9 | 1,8E-04 |
| CG3168     | FBgn0029896 | CG3168 gene product from transcript CG3168-RG   | -2,0 | 1,4E-02 |

|          |             |                                                 |      |         |
|----------|-------------|-------------------------------------------------|------|---------|
| CG15465  | FBgn0029746 | CG15465 gene product from transcript CG15465-RB | -2,2 | 2,2E-02 |
| Rpn13R   | FBgn0029745 | Regulatory particle non-ATPase 13-related       | -2,4 | 1,3E-03 |
| CG5455   | FBgn0039430 | CG5455 gene product from transcript CG5455-RA   | -2,7 | 3,9E-05 |
| fend     | FBgn0030090 | forked end                                      | -3,1 | 3,9E-03 |
| GstE1    | FBgn0034335 | Glutathione S transferase E1                    | -3,6 | 9,5E-05 |
| Ac76E    | FBgn0004852 | Adenylyl cyclase 76E                            | -5,4 | 1,9E-04 |
| Tektin-C | FBgn0035638 | Tektin C                                        | -6,8 | 4,3E-05 |
| Syt4     | FBgn0028400 | Synaptotagmin 4                                 | -7,0 | 4,0E-06 |
