# Supplementary material for: Eiger/TNFα-mediated Dilp8 and ROS production coordinate intra-organ growth in Drosophila
Source: PubMed Central journal article supplement (PMC6715248; doi:10.1371/journal.pgen.1008133), 2019-08-19
Supplement: pgen.1008133.s008.pdf [file pgen.1008133.s008.pdf]

| Gene ID | Gene Name                       | VDRC ID |
|---------|---------------------------------|---------|
| CG11527 | Tiggrin                         | 100036  |
| CG11853 | takeout                         | 51463   |
| CG11853 | takeout                         | 100079  |
| CG11062 | activin-beta                    | 108663  |
| CG10382 | wrapper                         | 105314  |
| CG6868  | tolloid                         | 100930  |
| CG8807  | lush                            | 102307  |
| CG10342 | neuropeptide F                  | 108772  |
| CG18105 | Ecdysis triggering hormone      | 18825   |
| CG2040  | hikaru genki                    | 109863  |
| CG7503  | Connectin                       | 101187  |
| CG12410 | crossveinless                   | 106311  |
| CG33950 | terribly reduced optic lobes    | 24549   |
| CG14049 | dilp6                           | 102465  |
| CG10521 | Netrin-B                        | 100840  |
| CG6134  | spatzle                         | 105017  |
| CG13780 | PDGF- and VEGF-related factor 2 | 102072  |
| CG5619  | trunk                           | 51240   |
| CG17579 | scabrous                        | 104703  |
| CG8285  | Boss                            | 4366    |
| CG1502  | twisted gastrulation            | 108750  |
| CG14430 | boudin                          | 107102  |
| CG32282 | dro4                            | 103505  |
| CG6127  | Serrate                         | 108348  |
| CG43758 | slit                            | 108853  |
| CG4698  | Wnt oncogene analog 4           | 104671  |
| CG4637  | hedgehog                        | 109454  |
| CG12919 | eiger                           | 108814  |
| CG32279 | dro2                            | 109207  |
| CG8167  | dilp2                           | 102158  |
| CG31695 | screw                           | 105303  |
| CG8458  | Wnt8                            | 107727  |
| CG6863  | tolkin                          | 2656    |
| CG34378 | PDGF- and VEGF-related factor 3 | 105008  |
| CG1916  | Wnt oncogene analog 2           | 104338  |
| CG18657 | Netrin-A                        | 108577  |
| CG10580 | fringe                          | 51977   |
| CG13687 | Prothoracicotropic hormone      | 102043  |
| CG13194 | pyramus                         | 36523   |
| CG1862  | Ephrin                          | 105139  |
| CG30040 | jelly belly                     | 103047  |
| CG10334 | spitz                           | 3922    |
| CG3619  | Delta                           | 109491  |
| CG4531  | argos                           | 47181   |
| CG9224  | short gastrulation              | 37407   |
| CG15009 | Ecdysone-inducible gene L2      | 106543  |
| CG32268 | dro6                            | 109106  |
| CG1171  | Adipokinetic hormone-like       | 105063  |
| CG14167 | dilp3                           | 106512  |
| CG6496  | Pigment-dispersing factor       | 50750   |
| CG7103  | PDGF- and VEGF-related factor 1 | 102699  |
| CG4608  | branchless                      | 101377  |
| CG3595  | sqh                             | 109493  |

|         |                             |        |
|---------|-----------------------------|--------|
| CG9280  | Glutactin                   | 101918 |
| CG15671 | crossveinless 2             | 109915 |
| CG2198  | amalgam                     | 22944  |
| CG9559  | folded gastrulation         | 101125 |
| CG10810 | Drosomycin                  | 2703   |
| CG4889  | wingless                    | 104579 |
| CG6371  | hugin                       | 107771 |
| CG5993  | outstretched                | 3282   |
| CG16987 | dawdle                      | 105309 |
| CG5014  | Vap-33-1                    | 30404  |
| CG17610 | gurken                      | 4332   |
| CG4637  | hedgehog                    | 1403   |
| CG13317 | dilp7                       | 105024 |
| CG17716 | faint sausage               | 102073 |
| CG6588  | Fasciclin I                 | 101779 |
| CG10812 | dro5                        | 109350 |
| CG8561  | convoluted                  | 44361  |
| CG5014  | Vap33                       | 100809 |
| CG6736  | dilp4                       | 105516 |
| CG10491 | vein                        | 109437 |
| CG17610 | gurken                      | 101701 |
| CG9224  | short gastrulation          | 105853 |
| CG13419 | bursicon                    | 102204 |
| CG31062 | sidestep                    | 1283   |
| CG32274 | drsl                        | 42370  |
| CG4846  | beaten path                 | 4543   |
| CG11326 | Thrombospondin              | 100721 |
| CG6407  | Wnt oncogene analog 5       | 101621 |
| CG2346  | FMRFamide-related           | 103981 |
| CG34395 | nubbin                      | 105044 |
| CG32179 | Keren                       | 104299 |
| CG14173 | dilp1                       | 5198   |
| CG4700  | semaphorin II               | 15810  |
| CG32283 | dro3                        | 105013 |
| CG6588  | Fasciclin I                 | 23015  |
| CG10236 | Laminin A                   | 18873  |
| CG12443 | thisbe                      | 102441 |
| CG17673 | Accessory gland peptide 70A | 109175 |
| CG3135  | shifted                     | 14803  |
