# Supplementary material for: Eiger/TNFα-mediated Dilp8 and ROS production coordinate intra-organ growth in Drosophila
Source: PubMed Central journal article supplement (PMC6715248; doi:10.1371/journal.pgen.1008133), 2019-08-19
Supplement: pgen.1008133.s009.pdf [file pgen.1008133.s009.pdf]

**DNA Damage Response pathway**

| ID          | Symbol | Gene                                            | logFC | P-value |
|-------------|--------|-------------------------------------------------|-------|---------|
| FBgn0041627 | Ku80   | CG18801 gene product from transcript CG18801-RA | 1,3   | 7,3E-03 |
| FBgn0040319 | Gclc   | Glutamate-cysteine ligase catalytic subunit     | 1,0   | 8,5E-04 |
| FBgn0261113 | Xrp1   | CG17836 gene product from transcript CG17836-RB | 1,0   | 9,4E-04 |
| FBgn0035996 | CG3448 | CG3448 gene product from transcript CG3448-RB   | 1,8   | 1,5E-03 |
| FBgn0030506 | Lig4   | Ligase4                                         | 0,9   | 6,3E-03 |
| FBgn0011774 | Irbp   | Inverted repeat-binding protein                 | 0,9   | 3,9E-03 |

**Jun-N terminal kinase pathway**

| ID          | Symbol | Gene                                            | logFC | P-value |
|-------------|--------|-------------------------------------------------|-------|---------|
| FBgn0026319 | Traf4  | TNF-receptor-associated factor 4                | 1,0   | 2,1E-02 |
| FBgn0036690 | Ilp8   | Insulin-like peptide 8                          | 3,9   | 6,6E-03 |
| FBgn0033153 | Gadd45 | CG11086 gene product from transcript CG11086-RA | 2,3   | 4,0E-04 |
| FBgn0033483 | egr    | eiger                                           | 1,3   | 1,1E-02 |
| FBgn0030964 | Pvf1   | PDGF- and VEGF-related factor 1                 | 1,1   | 4,6E-02 |

**ROS/Glutathione metabolism**

| ID          | Symbol  | Gene                                            | logFC | P-value |
|-------------|---------|-------------------------------------------------|-------|---------|
| FBgn0063494 | GstE6   | Glutathione S transferase E6                    | 3,3   | 1,4E-05 |
| FBgn0010041 | GstD5   | Glutathione S transferase D5                    | 2,6   | 4,0E-03 |
| FBgn0033696 | Cyp6g2  | CG8859 gene product from transcript CG8859-RA   | 1,5   | 3,6E-03 |
| FBgn0063493 | GstE7   | Glutathione S transferase E7                    | 1,2   | 1,9E-04 |
| FBgn0063491 | GstE9   | Glutathione S transferase E9                    | 1,2   | 3,0E-03 |
| FBgn0040319 | Gclc    | Glutamate-cysteine ligase catalytic subunit     | 1,0   | 8,5E-04 |
| FBgn0086348 | se      | sepia                                           | -1,3  | 4,2E-02 |
| FBgn0014469 | Cyp4e2  | Cytochrome P450-4e2                             | -1,6  | 1,2E-03 |
| FBgn0034335 | GstE1   | Glutathione S transferase E1                    | -3,6  | 9,5E-05 |
| FBgn0040251 | Ugt86Di | CG6658 gene product from transcript CG6658-RB   | 1,3   | 7,3E-04 |
| FBgn0052196 | CG32196 | CG32196 gene product from transcript CG32196-RC | 1,4   | 3,1E-03 |
| FBgn0010038 | GstD2   | Glutathione S transferase D2                    | 0,9   | 6,5E-02 |
| FBgn0063495 | GstE5   | Glutathione S transferase E5                    | 0,8   | 6,0E-02 |
| FBgn0028396 | TotA    | Turandot A                                      | 3,6   | 1,2E-02 |

**Ligands/secreted proteins**

| ID          | Symbol  | Gene                             | logFC | P-value |
|-------------|---------|----------------------------------|-------|---------|
| FBgn0036690 | Ilp8    | Insulin-like peptide 8           | 3,9   | 6,6E-03 |
| FBgn0034709 | Swim    | Secreted Wg-interacting molecule | 3,8   | 4,0E-05 |
| FBgn0028396 | TotA    | Turandot A                       | 3,6   | 1,2E-02 |
| FBgn0033574 | Spn47C  | Serpin 47C                       | 2,8   | 1,7E-05 |
| FBgn0085256 | CG34227 | -                                | 2,2   | 2,2E-03 |
| FBgn0004629 | Cys     | Cystatin-like                    | 2,1   | 5,2E-02 |
| FBgn0039299 | CG11854 | -                                | 2,0   | 5,4E-02 |

|             |         |                                 |      |         |
|-------------|---------|---------------------------------|------|---------|
| FBgn0031461 | daw     | dawdle                          | 1,8  | 2,3E-01 |
| FBgn0035092 | Nplp1   | Neuropeptide-like precursor 1   | 1,5  | 6,3E-02 |
| FBgn0033483 | egr     | eiger                           | 1,3  | 1,1E-02 |
| FBgn0003495 | spz     | spätzle                         | 1,2  | 6,1E-02 |
| FBgn0034162 | CG6426  | -                               | 1,1  | 2,7E-02 |
| FBgn0030964 | Pvf1    | PDGF- and VEGF-related factor 1 | 1,1  | 4,6E-02 |
| FBgn0043532 | Obp56i  | Odorant-binding protein 56i     | 0,9  | 2,8E-02 |
| FBgn0041182 | Tep2    | Thioester-containing protein 2  | -0,8 | 2,3E-02 |
| FBgn0260660 | Mp      | Multiplexin                     | -0,9 | 2,5E-02 |
| FBgn0015774 | NetB    | Netrin-B                        | -1,0 | 4,7E-02 |
| FBgn0034468 | Obp56a  | Odorant-binding protein 56a     | -1,6 | 4,9E-02 |
| FBgn0054002 | CG34002 | -                               | -1,6 | 4,8E-04 |
