# Supplementary material for: Eiger/TNFα-mediated Dilp8 and ROS production coordinate intra-organ growth in Drosophila
Source: PubMed Central journal article supplement (PMC6715248; doi:10.1371/journal.pgen.1008133), 2019-08-19
Supplement: pgen.1008133.s010.pdf [file pgen.1008133.s010.pdf]

| Gen Name | Primer Fw                   | Primer Rv                   |
|----------|-----------------------------|-----------------------------|
| Arc1     | ACTTCTCCGCTTGCACACAC        | TCCTTGTATGTCTCGATGTTGC      |
| CG6908   | GCCAACAGGTGAACGATATGG       | TGGCTCGAATTTTGTGATCC        |
| Hr51     | GAAAGCACTACGGAATCCTAGC      | CCTGGCAGCGATAAATGAGTTT      |
| Damm     | AGTGAAGGAGTGGTCTGCAAA       | CAAGTGGTATTCCTGTGGTC        |
| Spn47C   | AACAACATGCGGAATCCTGGA       | TGACGTACAATCGTGTGACCA       |
| CG15784  | GGAGCGTGTTTCCCAAGAG         | CCTTTTGGTGCCCTGTTCT         |
| mbl      | TTGAATCAAATTATAGCCCAAGCT    | CGATTTTGTCTCGTTAGCGTTT      |
| CG11893  | CCAGAAAACGCAGATACCGAG       | ACGTCAGTAATAAACTGGGCATT     |
| TotA     | TCAACTGCTCTTATGTGCTTTGC     | CTCACGATCTTCGTGGAATAG       |
| Cys      | TGTATTTGGGTCTGTTCTCG        | CTCCTTCTGCTGTTTCCCTC        |
| CG11854  | AAAGCGGTATCAAGGAGCTGG       | GATTGCGTCCGATTTTGAACTTC     |
| mmp1     | TCAGTGTTTATAGTCGTAGGCA      | GGTAGATAGCCGAACCTGGGAC      |
| rpr      | TGGCATTCTACATACCCGATCA      | CCAGGAATCTCCACTGTGACT       |
| egr      | CAGCTGATCCCCCTGGTTTT        | GCCAGATCGTTAGTGCGAGA        |
| Ku80     | ATGGCTTCTAACAAGGAATGCC      | AGAATCTCCGCCACACATTTTG      |
| Xrp1     | GTATCGACATCAACCAGGAGC       | GCGAGATAGGGTCTCTGA          |
| Corp     | CAGCTTGAAGTTCTCTCCAG        | GGGAGATGACCTCTCGTAAGT       |
| dilp8    | ACGCACAACAAGCATCACTAC       | AGTTCGCTGAGGCGATTGAAG       |
| Nlaz     | ACGCCAACTACAGTCTCATAGA      | CGAGGGTTGTCCGGTGAATC        |
| upd3     | ATCCCCTGAAGCACCTACAGA       | CAGTCCAGATGCGTACTGCTG       |
| daw      | CGGTTCCAGGTGTTTCAGC         | ATCCTTCGTCCGCATCCTAAG       |
| puc      | AGC GAT ACG CCA CAT CAG AAC | ACT TGT ACC GCA TGA CGT AGG |
| upd2     | TCTTCTGCTGATCCTTGCGGAACT    | AGCTAAAGACTTGGTACCGCCACA    |
| egr.prom | TTCCCTCAGTTCACGCTCC         | CTTCGCTATCATGCACGCAC        |
| rpr.prom | TGTCAGTTGGTTCTTCCACT        | GTCGATGCACGCTGAGTGA         |
| egr.3UTR | TCGCCAGCGTGAATCCATTA        | CACGCTTACACAAGCGGGTA        |
| egr.l1   | CTCCAAAAACCATCACAAACGACA    | CTAGAAGGCGGTTTCATGGCT       |
